# Supplementary figures and images for: Evolutionary Events Promoted Polymerase Activity of H13N8 Avian Influenza Virus
Source: MDPI journal article supplement (doi:10.3390/v16030329), 2024-02-21

Tree scale: 0.1

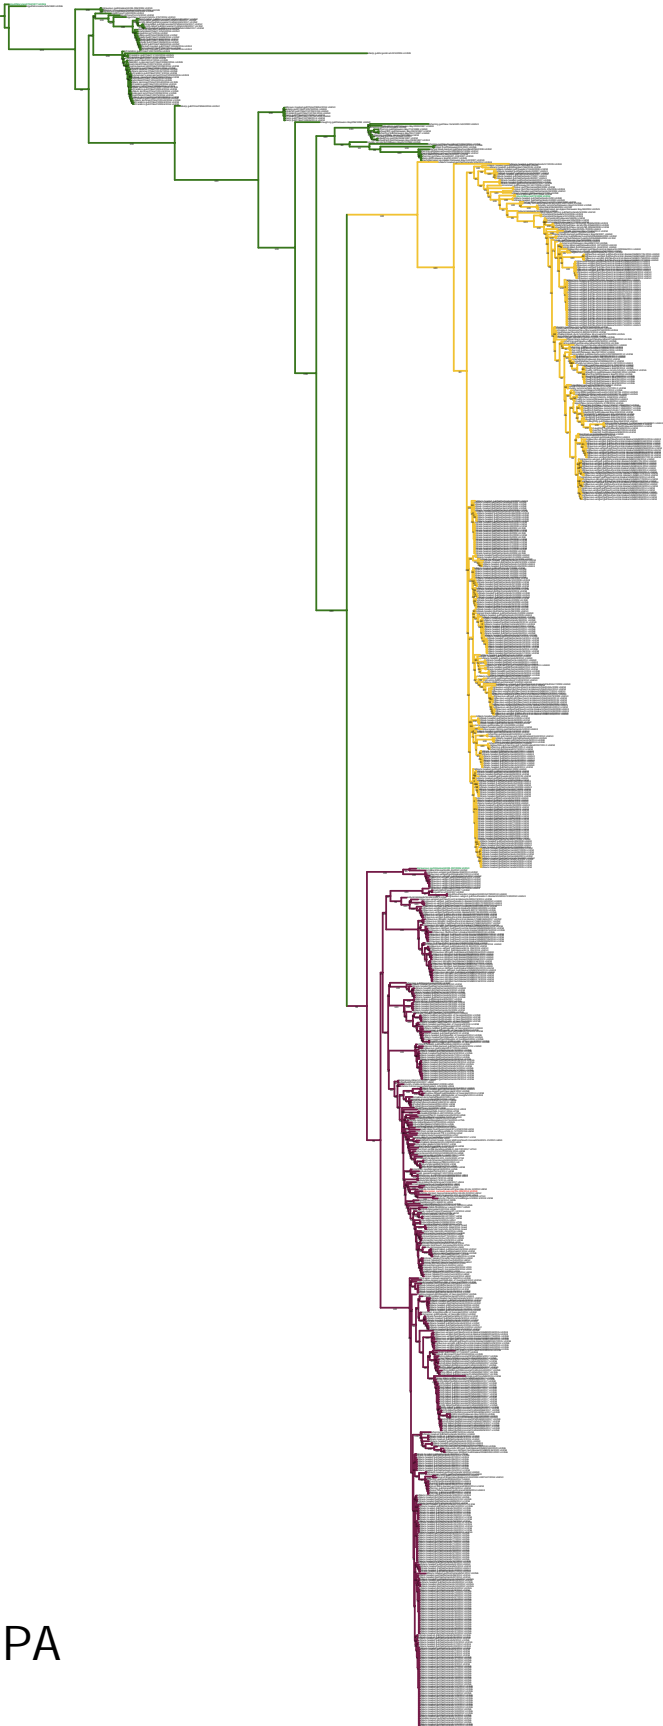

PA

Supplement: s1 [file s1]

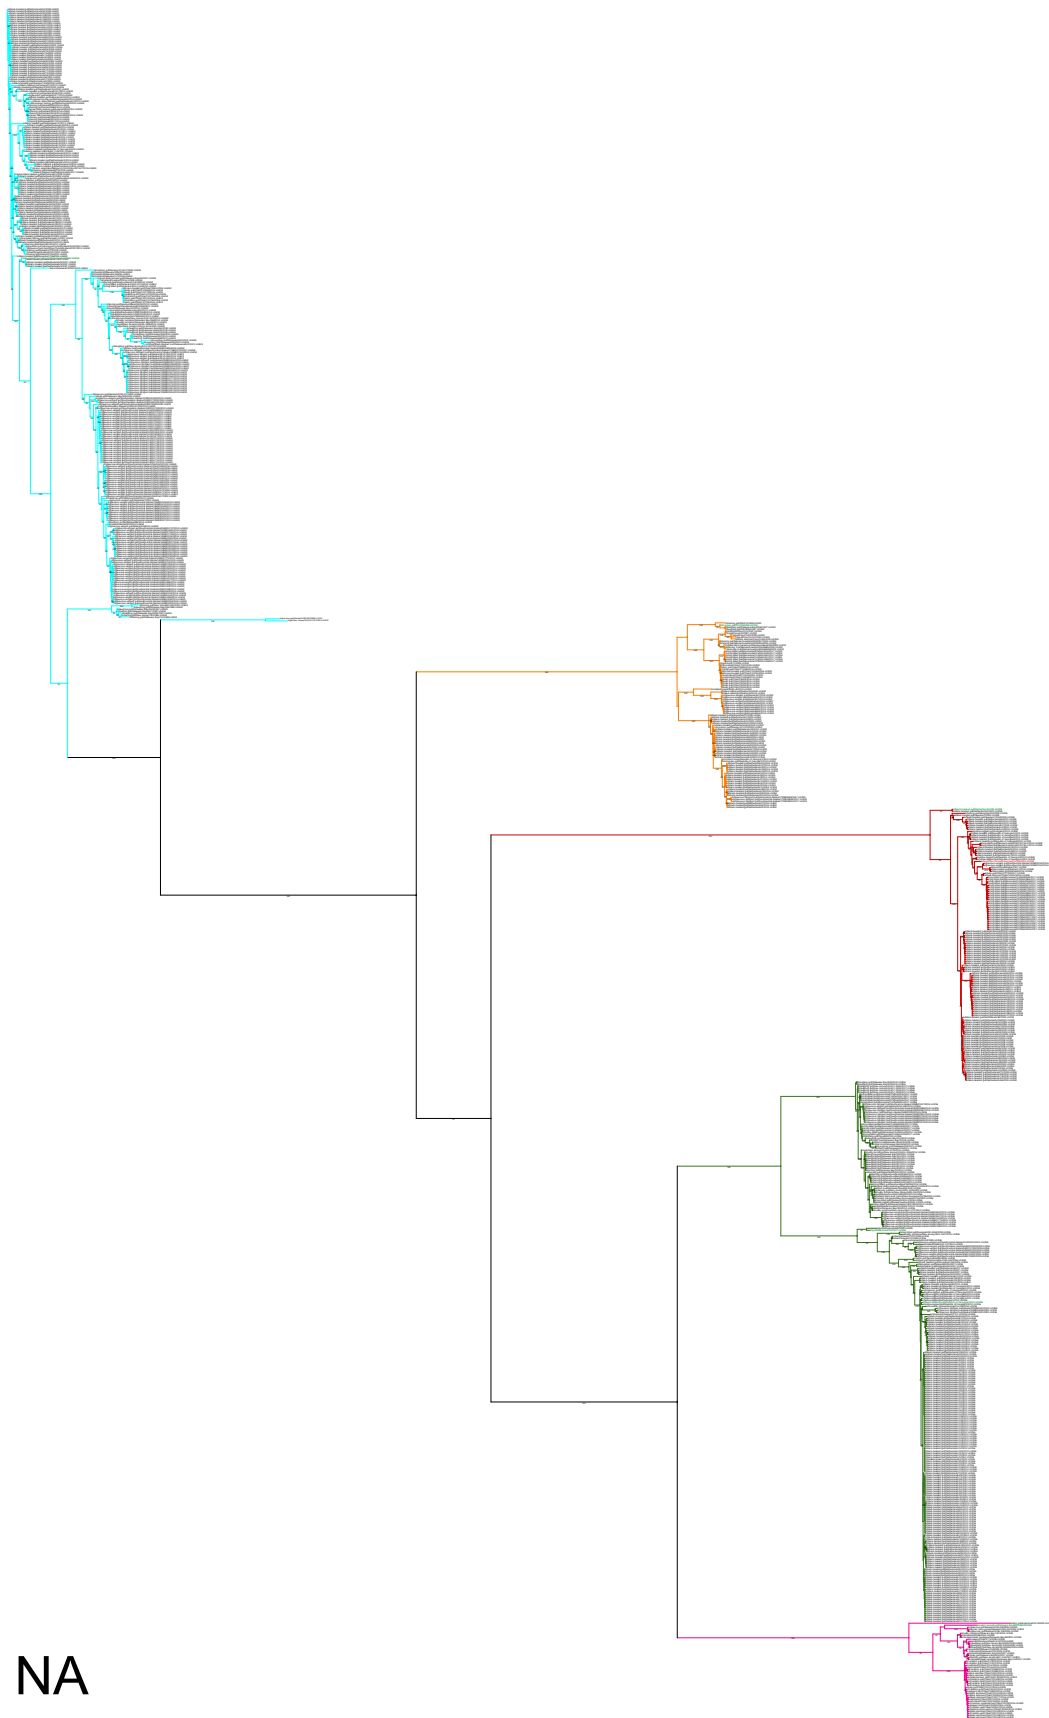

NA

Supplement: s1 [file s1]

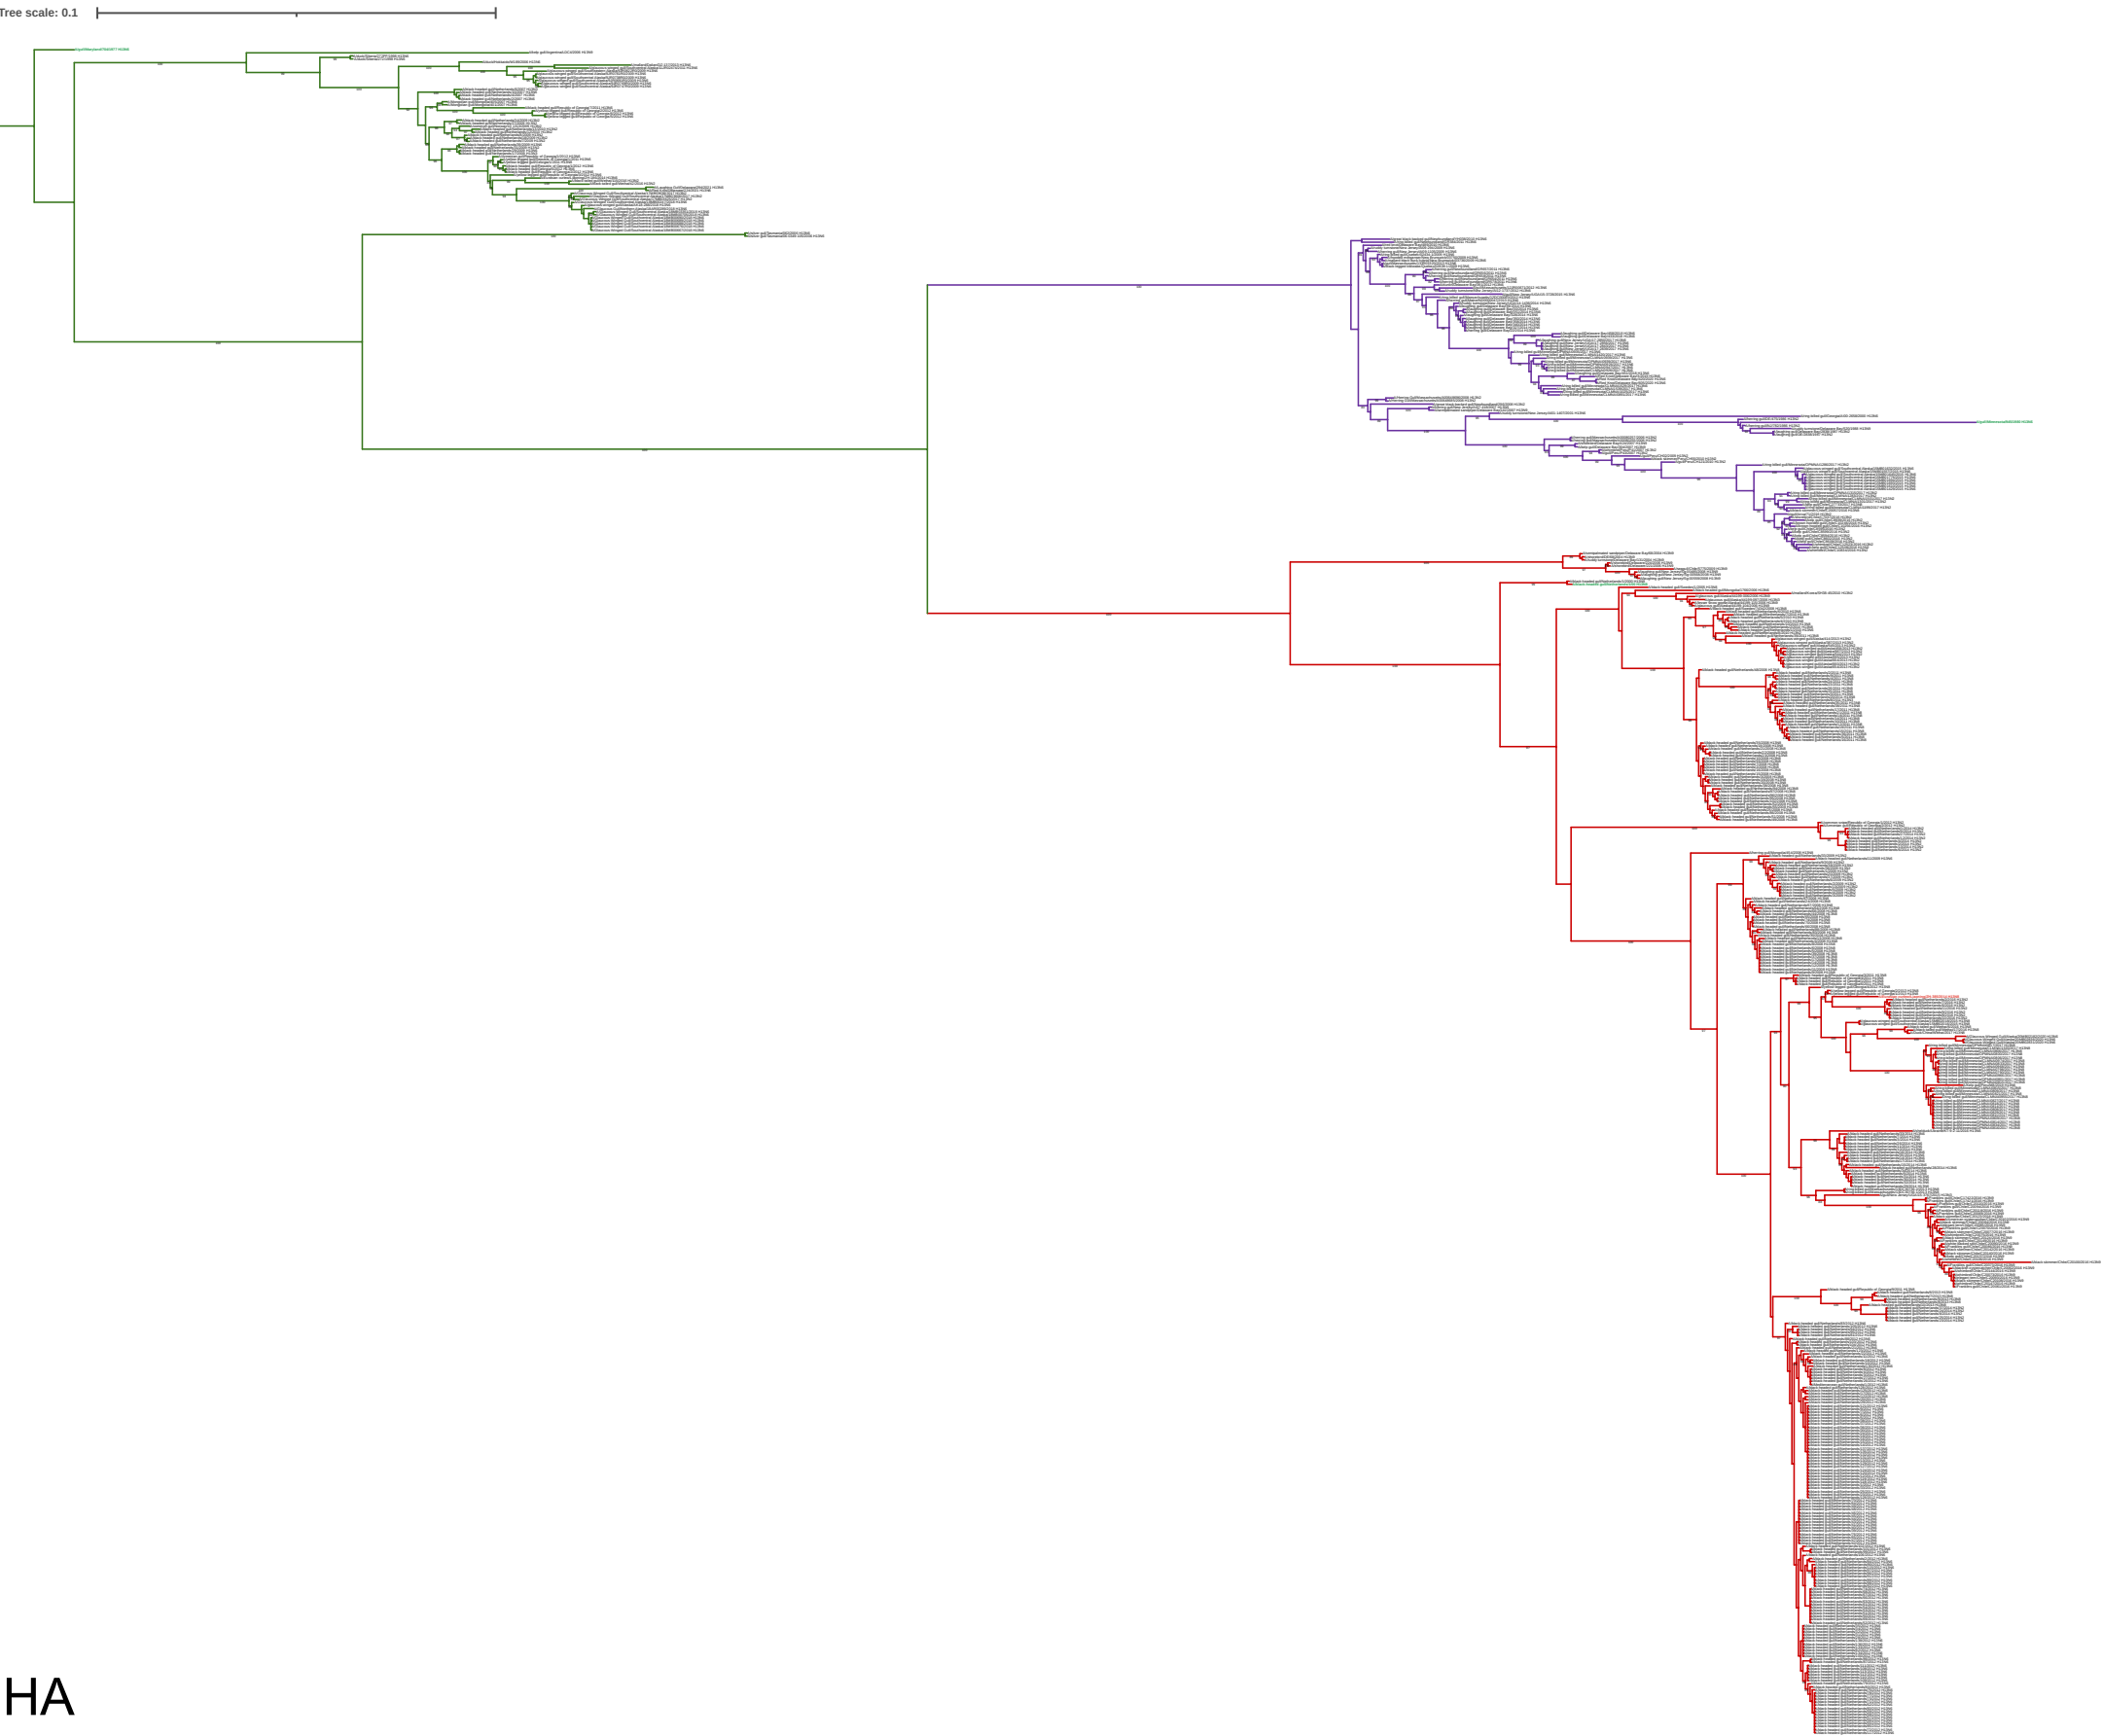

HA

Supplement: s1 [file s1]

Tree scale: 0.1

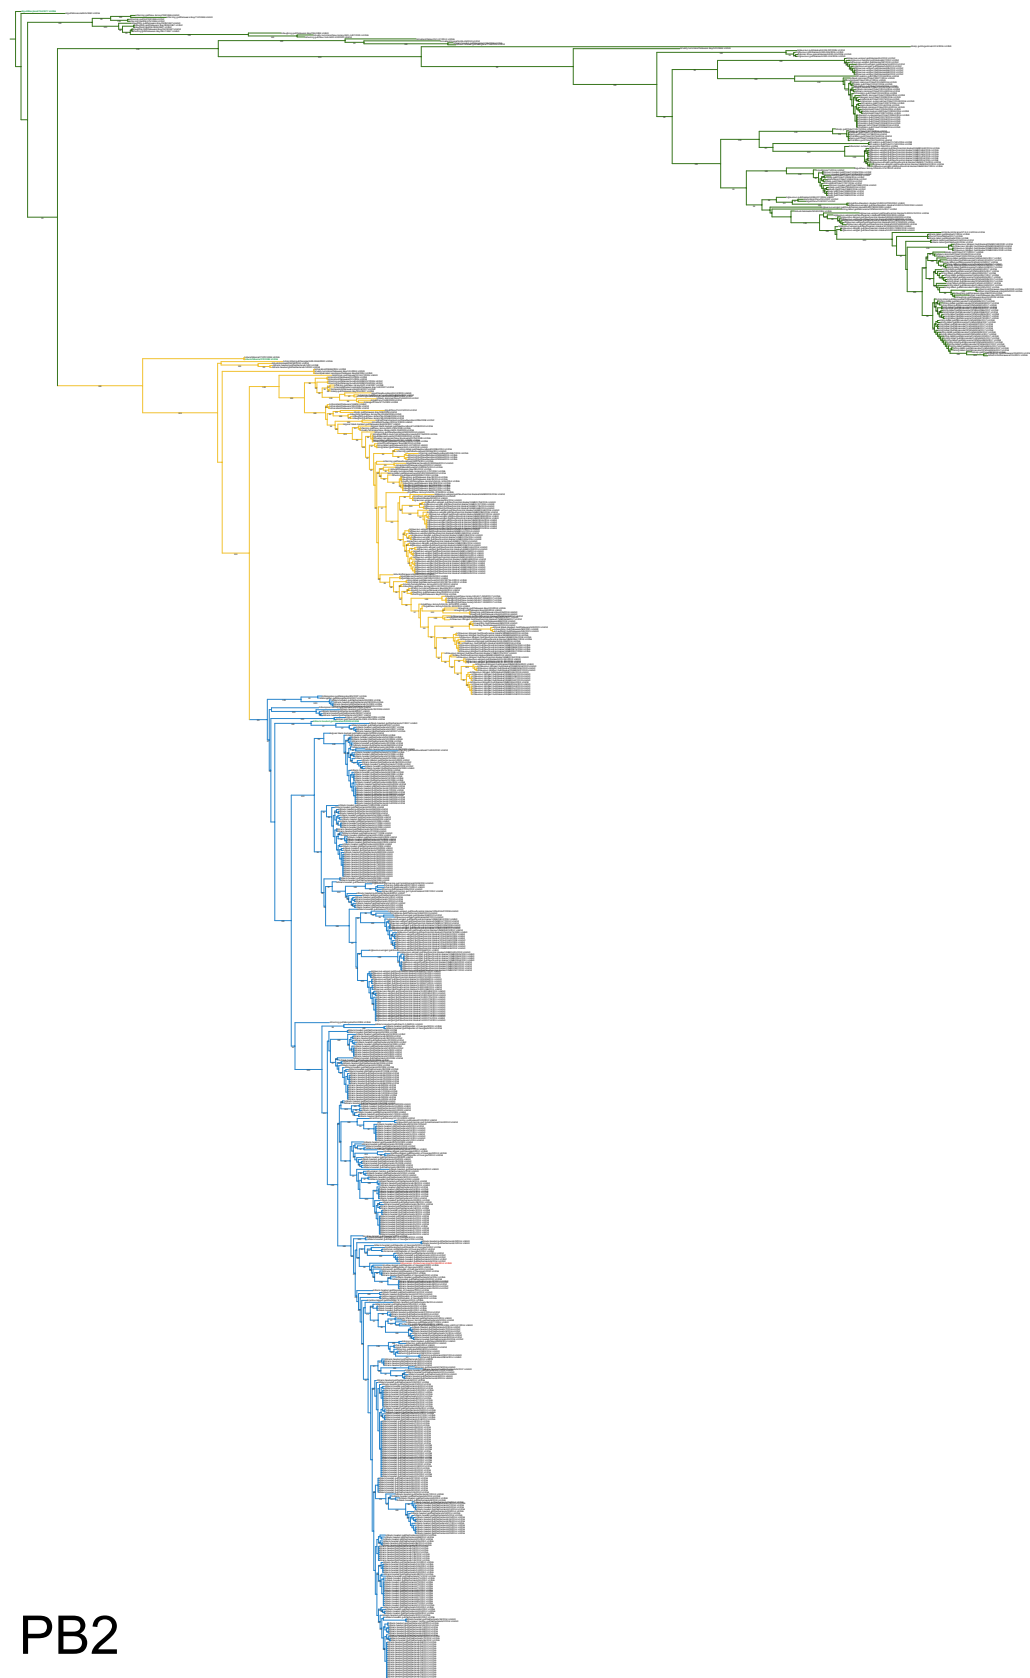

PB2

Supplement: s1 [file s1]

Tree scale: 0.1

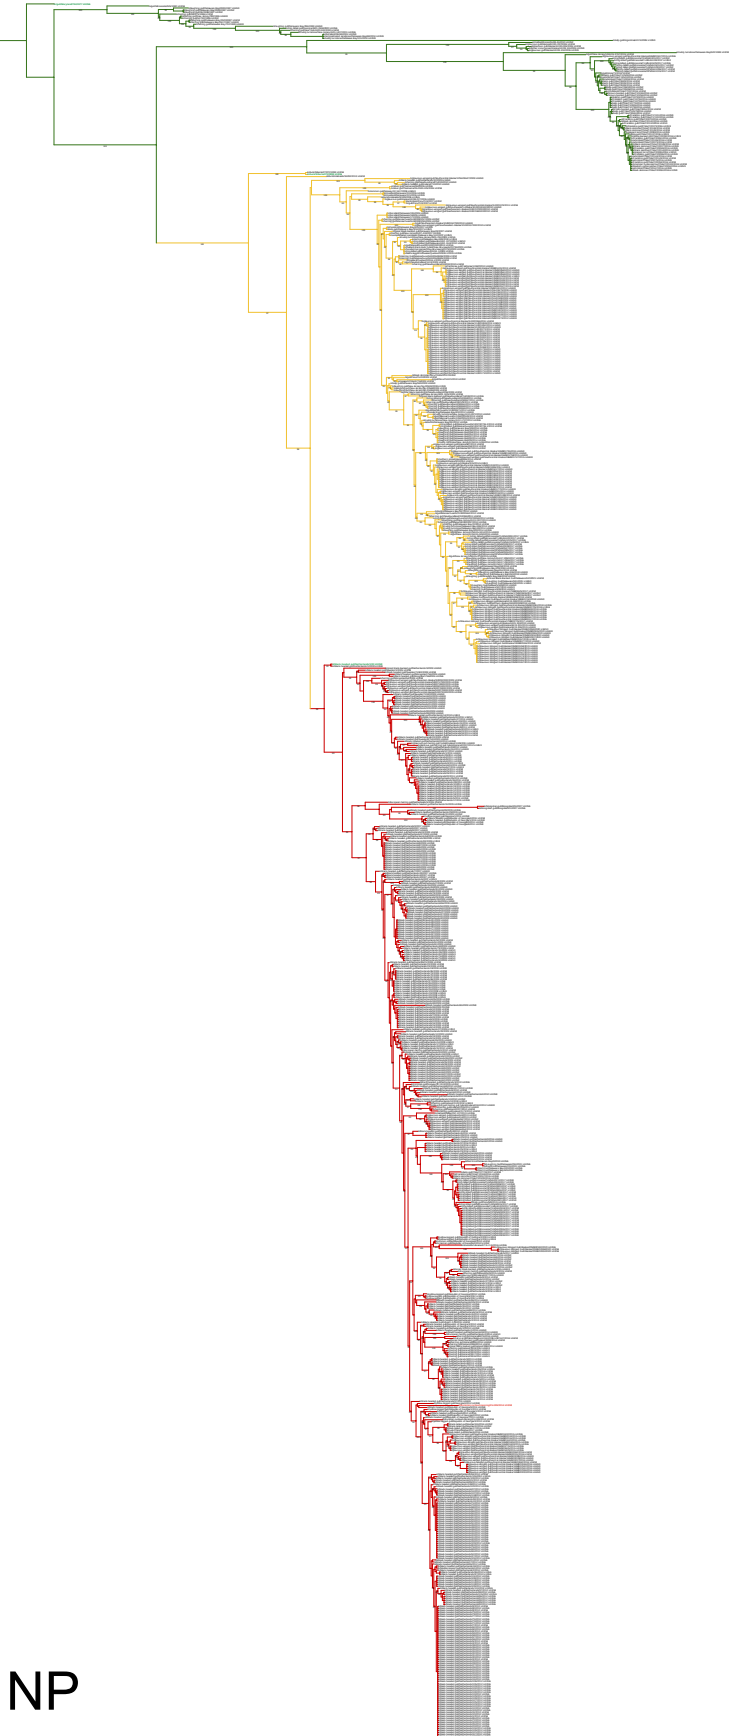

NP

Supplement: s1 [file s1]

Tree scale: 0.1

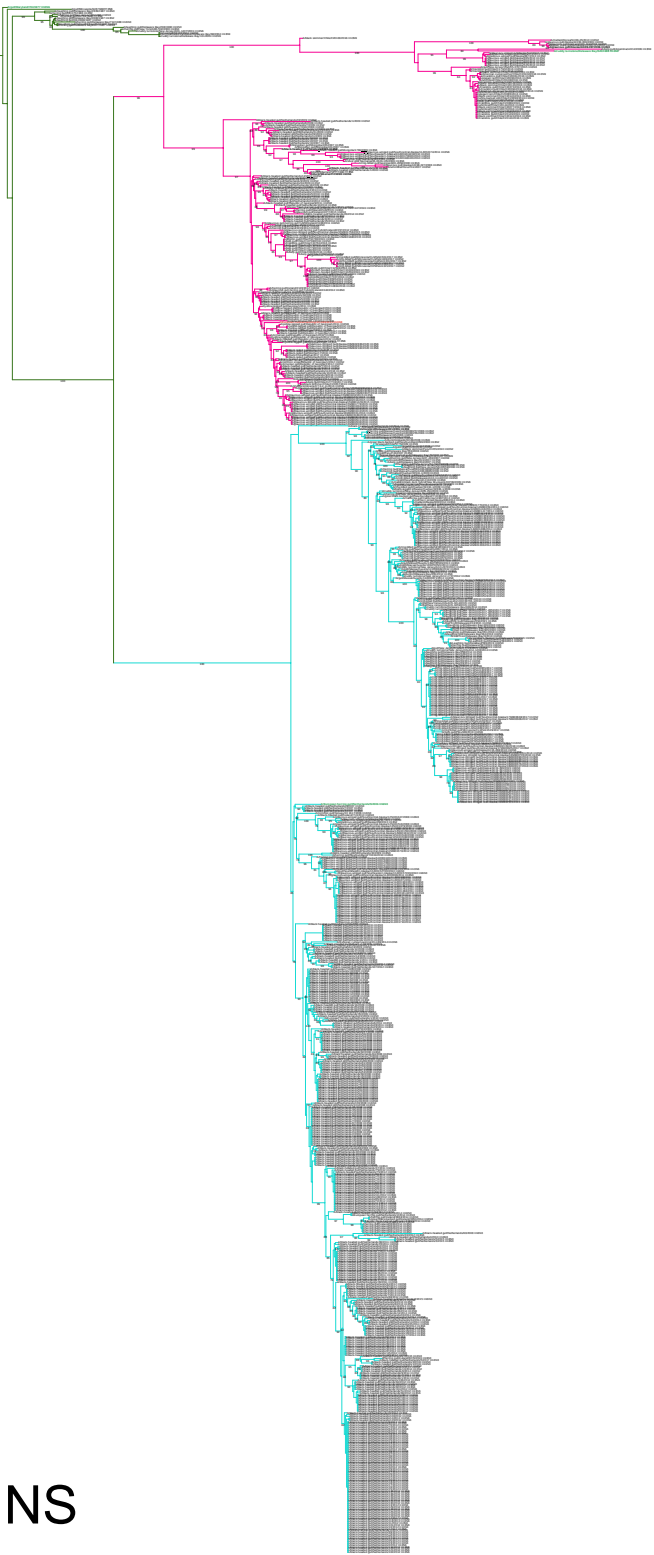

NS

Supplement: s1 [file s1]

Tree scale: 0.1

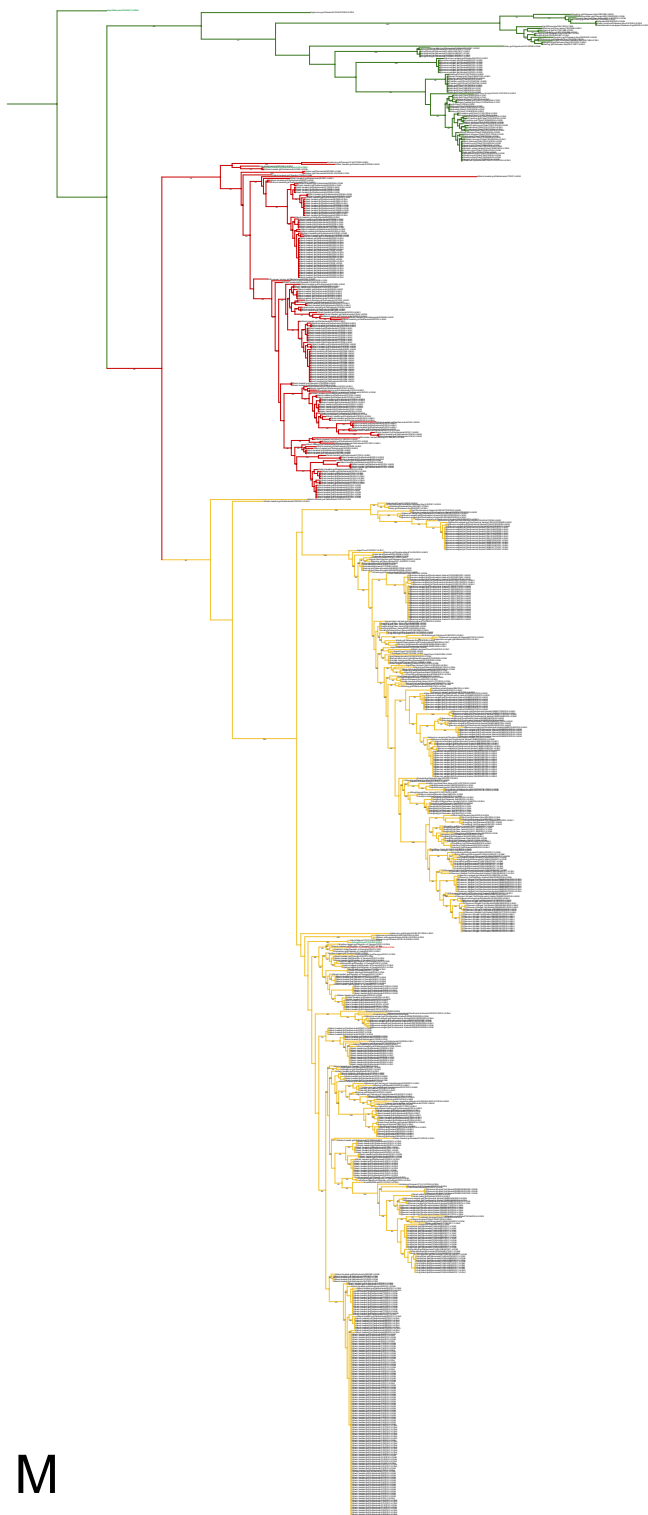

M

Supplement: s1 [file s1]

Tree scale: 0.1

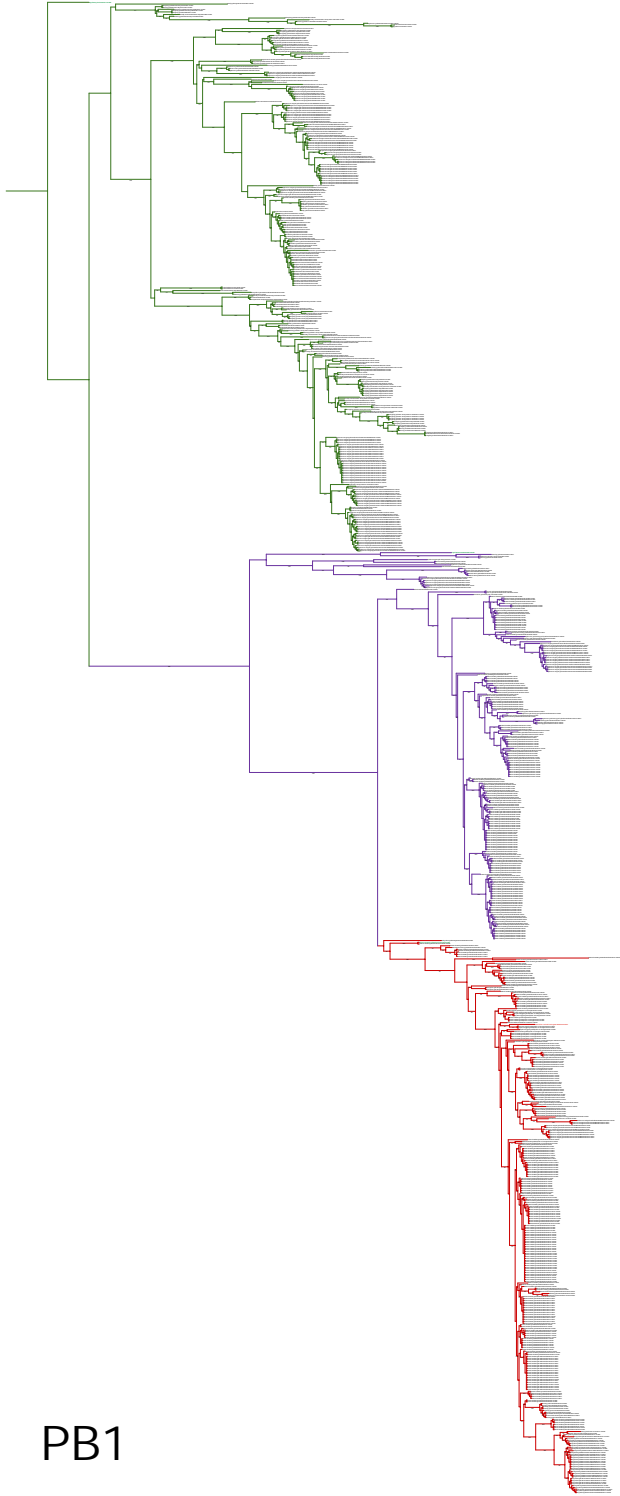

PB1

Supplement: s1 [file s1]
